# Supplementary material
Source: Springer Nature journal article supplement (https://www.springermedizin.de/resource/supplementary/12943_2009_568_MOESM4_ESM.pdf/9554990)
Supplement: MOESM4 [file 9554990]

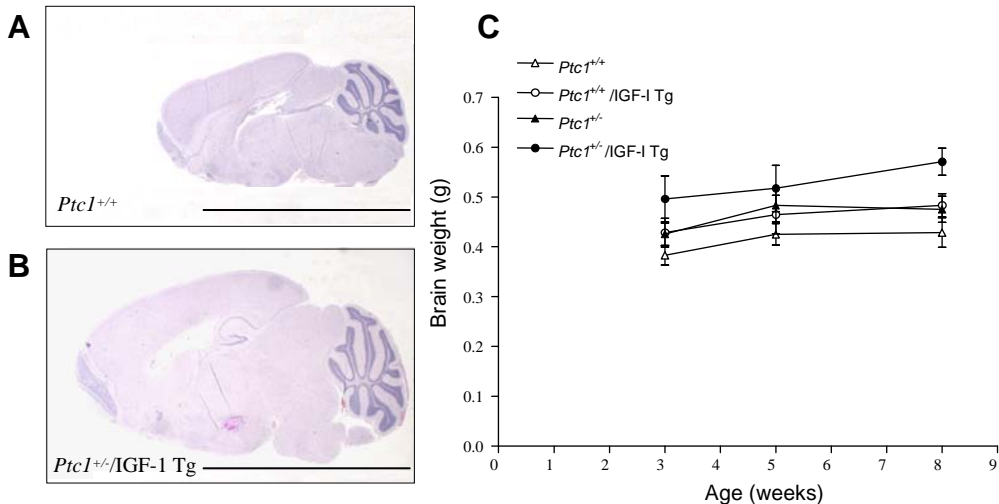

**D** **Brain numbers (n) and weight (g)**

| Age (weeks) | <i>Ptc1<sup>+/+</sup></i> |                       | <i>Ptc1<sup>+/-</sup></i> |                       |
|-------------|---------------------------|-----------------------|---------------------------|-----------------------|
|             | IGF-1 wt                  | IGF-1 Tg <sup>a</sup> | IGF-1 wt <sup>b</sup>     | IGF-1 Tg <sup>c</sup> |
| 3           | (n= 29) 0.38              | (n=20) 0.43***        | (n=21) 0.43***            | (n=19) 0.50***        |
| 5           | (n= 10) 0.43              | (n=23) 0.47**         | (n=13) 0.48***            | (n=22) 0.52*          |
| 8           | (n=14) 0.43               | (n=17) 0.48***        | (n=11) 0.48***            | (n=16) 0.57***        |

<sup>a</sup> *Ptc1<sup>+/+</sup>/IGF-1 wt vs. Ptc1<sup>+/+</sup>/IGF-1 Tg*

\* $P \leq 0.05$

<sup>b</sup> *Ptc1<sup>+/+</sup>/IGF wt vs. Ptc1<sup>+/-</sup>/IGF-1 wt*

\*\* $P \leq 0.005$

<sup>c</sup> *Ptc1<sup>+/-</sup>/IGF-1 wt vs. Ptc1<sup>+/-</sup>/IGF-1 Tg*

\*\*\* $P \leq 0.0001$
